# Supplementary material for: A Structural Perspective on the RNA Editing of Plant Respiratory Complexes
Source: MDPI journal article supplement (doi:10.3390/ijms23020684), 2022-01-08
Supplement: s1 [file s1]

### Supplementary File S1.

This file contains the details for all the analyzed RNA edits in complex I, complex III<sub>2</sub> and complex IV. References for each subunit can be found at the end of each subunit table.

#### Code key:

- M = in the membrane
- A = amino acid properties
- C = restoration to highly conserved residue
- P = proline removal from alpha helix or beta sheet
- K = vicinity of key functional residues (e.g., hydrophilic axis)
- H = in vicinity of heme
- Q = in vicinity of quinone binding site
- KC = in vicinity of K proton channel
- HC = in vicinity of H proton channel
- DC = in vicinity of D proton channel
- Cu = in vicinity of Cu co-factor
- I = at interface with other subunits
- E = potential interaction with other edited residues
- Ph = lack of edit leads to observed phenotype

#### Species key:

- Pd = *Paracoccus denitrificans*
- RS = *Rhodobacter sphaeroides*
- Sc = *Saccharomyces cerevisiae*
- Yl = *Yarrowia lipolytica*
- Cr = *Chlamydomonas reinhardtii*
- Dm = *Drosophila melanogaster*
- Bt = *Bos taurus*
- Hs = *Homo sapiens*
- At = *Arabidopsis thaliana*
- Vr = *Vigna radiata*
- Zm = *Zea mays*
- Ob = *Oenothera berteriana*
- Bn = *Brassica napus*
- Rs = *Raphanus sativus*
- Ta = *Triticum aestivum*
- Bv = *Beta vulgaris*
- Ac = *Allium cepa*
- Pp = *Physcomitrella patens*
- Hv = *Hordeum vulgare*
- Os = *Oryza sativa*
- St = *Solanum tuberosum*
- Ps = *Pisum sativum*
- Gm = *Glycine max*
- Mg = *Magnolia grandiflora*
- Oe = *Olea europaea*

## Complex I NAD1

| Position (At) | mt-DNA | Edited to: | Conservation of edited residue outside of plants | In plants         | Code                     |
|---------------|--------|------------|--------------------------------------------------|-------------------|--------------------------|
| 1             | T      | M          | N/A                                              | <i>At, Zm</i>     | M                        |
| 56            | S      | L          | <i>Pd</i>                                        | <i>At</i>         | A                        |
| 89            | R      | W          | <i>Yl, Dm, Hs</i>                                | <i>At, Vr</i>     | M, A, Ph – GRS1 PPR      |
| 103           | P      | L          | <i>Yl, Hs</i>                                    | <i>At</i>         | M, I                     |
| 126           | R      | W          | <i>Pd, Yl, Dm, Hs</i>                            | <i>At</i>         | M, A, C, I               |
| 164           | P      | S          | <i>Pd, Yl, Dm, Hs</i>                            | <i>At, Vr</i>     | M, C                     |
| 165           | R      | C          | N/A                                              | <i>At, Vr</i>     | M, I                     |
| 167           | S      | L          | <i>Pd, Hs</i>                                    | <i>At, Vr</i>     | M, A                     |
| 179           | S      | F          | <i>Dm</i>                                        | <i>At, Vr</i>     | M, A                     |
| 191           | L      | F          | <i>Pd, Yl, Hs</i>                                | <i>At</i>         | M                        |
| 194           | R      | C          | N/A                                              | <i>At, Vr</i>     | M, K                     |
| 203           | S      | F          | <i>Pd, Yl, Dm, Hs</i>                            | <i>At, Zm</i>     | M, A, C, Ph – Dek605 PPR |
| 212           | S      | L          | <i>Pd, Yl, Dm, Hs</i>                            | <i>At</i>         | A, C, I                  |
| 225           | S      | F          | <i>Pd, Yl, Dm, Hs</i>                            | <i>At, Vr</i>     | M, A                     |
| 242           | P      | L          | <i>Pd, Dm, Hs</i>                                | <i>At, Vr</i>     | M, P                     |
| 248           | P      | L          | <i>Yl, Dm, Hs</i>                                | <i>At, Vr, Zm</i> | M, Ph – SMK6 PPR         |
| 252           | P      | L          | <i>Pd, Yl</i>                                    | <i>At, Vr</i>     | M                        |
| 275           | L      | F          | <i>Pd, Yl, Dm</i>                                | <i>At</i>         | M                        |
| 300           | R      | W          | <i>Pd, Yl, Dm, Hs</i>                            | <i>At, Vr</i>     | M, A, C, I               |
| 310           | R      | W          | N/A                                              | <i>At, Vr</i>     | M, A, I                  |
| 313           | P      | S          | N/A                                              | <i>At</i>         | M, P, I                  |

## References

- Ding S, Liu XY, Wang HC, et al. *SMK6 mediates the C-to-U editing at multiple sites in maize mitochondria*. J Plant Physiol., 2019. **240**:152992.
- Fan K, Peng Y, Ren Z, et al. *Maize Defective Kernel605 Encodes a Canonical DYW-Type PPR Protein that Edits a Conserved Site of nad1 and Is Essential for Seed Nutritional Quality* [published correction appears in Plant Cell Physiol.,2021 Nov 17;**62**(9):1502]. Plant Cell Physiol., 2020. **61**(11):1954-1966.

Maldonado M, Padavannil A, Zhou L, Guo F, Letts JA. *Atomic structure of a mitochondrial complex I intermediate from vascular plants*. Elife, 2020. **9**: e56664.

Xie T, Chen D, Wu J, Huang X, Wang Y, Tang K, Li J, Sun M, Peng X. *Growing Slowly 1 locus encodes a PLS-type PPR protein required for RNA editing and plant development in Arabidopsis*. J Exp Bot., 2016. **67**(19):5687-5698.

## NAD2

| Position (At) | mt-DNA | Edited to: | Conservation of edited residue outside of plants | In plants         | Code                    |
|---------------|--------|------------|--------------------------------------------------|-------------------|-------------------------|
| 20            | S      | F          | N/A                                              | <i>At, Ob</i>     | M, A, I, Ph – DEK40 PPR |
| 30            | S      | F          | N/A                                              | <i>At, Ob</i>     | M, A, I                 |
| 87            | L      | F          | N/A                                              | <i>Ob</i>         | M                       |
| 114           | S      | F          | N/A                                              | <i>At, Ob</i>     | M, A, E                 |
| 115           | S      | F          | N/A                                              | <i>At, Ob</i>     | M, A, E                 |
| 123           | S      | F          | N/A                                              | <i>Zm</i>         | M, P                    |
| 130           | P      | L          | N/A                                              | <i>At, Zm, Ob</i> | M, P, I                 |
| 132           | P      | S          | N/A                                              | <i>At, Zm, Ob</i> | M, P                    |
| 134           | R      | C          | N/A                                              | <i>At, Zm, Ob</i> | M, A                    |
| 141           | P      | S          | N/A                                              | <i>Zm</i>         | M                       |
| 143           | H      | Y          | N/A                                              | <i>At, Zm, Ob</i> | M, A                    |
| 145           | S      | L          | N/A                                              | <i>Ob</i>         | M, A, I                 |
| 154           | P      | L          | <i>Pd, Yl</i>                                    | <i>At, Ob</i>     | M, P, K, I              |
| 177           | S      | L          | <i>Pd</i>                                        | <i>At, Zm, Ob</i> | M, A, I                 |
| 186           | P      | S          | <i>Pd</i>                                        | <i>Zm, Ob</i>     | M, P, K                 |
| 232           | S      | F          | <i>Pd</i>                                        | <i>At, Ob</i>     | M, A                    |
| 274           | S      | F          | N/A                                              | <i>At, Zm, Ob</i> | M, A, K                 |
| 278           | S      | L          | N/A                                              | <i>Zm, Ob</i>     | M, A                    |
| 281           | S      | F          | N/A                                              | <i>At, Zm, Ob</i> | M, A                    |
| 318           | P      | L          | <i>Pd, Yl, Dm</i>                                | <i>At, Zm, Ob</i> | M, P                    |
| 321           | H      | Y          | <i>Pd, Hs</i>                                    | <i>At, Zm, Ob</i> | M, A                    |
| 331           | R      | C          | N/A                                              | <i>At, Zm, Ob</i> | M, K                    |
| 332           | T      | I          | N/A                                              | <i>At, Zm, Ob</i> | M, A                    |
| 354           | S      | L          | N/A                                              | <i>Zm</i>         | M, A, K                 |
| 364           | S      | L          | N/A                                              | <i>At, Zm, Ob</i> | M, A                    |
| 386           | T      | I          | N/A                                              | <i>Ob</i>         | M, A, I                 |
| 387           | S      | L          | <i>Yl, Hs, Dm</i>                                | <i>At, Zm, Ob</i> | M, A                    |
| 427           | P      | S          | N/A                                              | <i>At, Zm, Ob</i> | M, P                    |
| 437           | R      | C          | N/A                                              | <i>At, Zm</i>     | M, I                    |
| 444           | A      | V          | N/A                                              | <i>Zm, Ob</i>     | M, I                    |
| 477           | T      | I          | <i>Yl, Hs</i>                                    | <i>Zm</i>         | M, A                    |

|     |   |   |     |                   |                        |
|-----|---|---|-----|-------------------|------------------------|
| 478 | S | L | N/A | <i>At, Zm, Ob</i> | M, A                   |
| 479 | S | F | N/A | <i>At, Zm, Ob</i> | M, A                   |
| 481 | P | L | N/A | <i>Zm</i>         | M, I                   |
| 485 | P | S | N/A | <i>Zm</i>         | M, I                   |
| 497 | S | L | N/A | <i>At, Zm, Ob</i> | M, A, Ph – Org1<br>PPR |

## References

- Binder S, Marchfelder A, Brennicke A, Wissinger B. *RNA editing in trans-splicing intron sequences of nad2 mRNAs in Oenothera mitochondria*. J Biol Chem., 1992. **267**(11):7615-7623.
- Giege, P. and A. Brennicke. *RNA editing in Arabidopsis mitochondria effects 441 C to U changes in ORFs*. Proc Natl Acad Sci U S A, 1999. **96**(26):15324-9.
- Kim SR, Yang JI, Moon S, Ryu CH, An K, Kim KM, Yim J, An G. *Rice OGR1 encodes a pentatricopeptide repeat-DYW protein and is essential for RNA editing in mitochondria*. Plant J., 2009. **59**(5):738-49.
- Morawala-Patell V, Gualberto JM, Lamattina L, Grienemberger JM, Bonnard G. *Cis- and trans-splicing and RNA editing are required for the expression of nad2 in wheat mitochondria*. Mol Gen Genet., 1998. **258**(5):503-511.
- Pruchner D, Beckert S, Muhle H, Knoop V. *Divergent intron conservation in the mitochondrial nad2 gene: signatures for the three bryophyte classes (mosses, liverworts, and hornworts) and the lycophytes*. J Mol Evol., 2002. **55**(3):265-271.
- Ren RC, Lu X, Zhao YJ, et al. *Pentatricopeptide repeat protein DEK40 is required for mitochondrial function and kernel development in maize*. J Exp Bot., 2019. **70**(21):6163-6179.
- Wang Y, Liu XY, Huang ZQ, et al. *PPR-DYW Protein EMP17 Is Required for Mitochondrial RNA Editing, Complex III Biogenesis, and Seed Development in Maize*. Front Plant Sci., 2021. **12**:693272.

## NAD3

| Position (At) | mt-DNA residue | Edited to: | Conservation of edited residue outside of plants | In plants                     | Code                       |
|---------------|----------------|------------|--------------------------------------------------|-------------------------------|----------------------------|
| 3             | S              | L          | N/A                                              | <i>At, Zm, Bn, Rs, Ta</i>     | M, A, I                    |
| 9             | S              | F          | <i>Dm</i>                                        | <i>At, Bn, Rs</i>             | M, A, I,                   |
| 16            | P              | L          | <i>Dm, Hs</i>                                    | <i>Zm, Ta</i>                 | M, P                       |
| 22            | P              | L          | <i>Pd, Yl</i>                                    | <i>Zm, Ta</i>                 | M, P, Ph – MEF47/Dek10 PPR |
| 28            | P              | L          | N/A                                              | <i>At, Zm, Bn, Rs, Ta</i>     | M, Ph                      |
| 47*           | L              | F          | <i>Pd, Dm, Hs</i>                                | <i>Zm, Ta</i>                 | Q                          |
| 50*           | S              | F          | <i>Pd, Yl</i>                                    | <i>At, Zm, Bn, Rs, Ta</i>     | A, Q                       |
| 63            | P              | L          | <i>Pd, Yl, Dm, Hs</i>                            | <i>Zm</i>                     | M, C, P, I                 |
| 65            | P              | S          | <i>Pd</i>                                        | <i>Zm, Ta</i>                 | M, P, I                    |
| 71            | P              | F          | <i>Pd, Yl, Dm, Hs</i>                            | <i>At, Vr, Zm, Bn, Rs, Ta</i> | M, C, P, K, I, E           |
| 73            | P              | L          | <i>Pd, Yl, Hs</i>                                | <i>Zm, Ta</i>                 | M, P, K, I                 |
| 78            | S              | F          | N/A                                              | <i>Zm, Ta</i>                 | M, A, I                    |
| 84            | P              | S          | <i>Pd, Yl</i>                                    | <i>At, Vr, Zm, Bn, Rs, Ta</i> | M, I                       |
| 85            | P              | L          | <i>Hs</i>                                        | <i>At, Vr, Zm, Bn, Rs, Ta</i> | M, I, Ph – PpPPR_56 PPR    |
| 93            | S              | F          | <i>Pd, Yl</i>                                    | <i>Zm, Ta</i>                 | M, A, I, E, Ph – EMP21     |
| 104           | T              | F          | N/A                                              | <i>Zm</i>                     | M, A, I                    |
| 107           | S              | F          | <i>Pd, Yl</i>                                    | <i>Ta</i>                     | M, A, I, E                 |
| 116           | S              | L          | <i>Pd, Yl, Dm, Hs</i>                            | <i>At, Vr, Zm, Bn, Rs, Ta</i> | M, A, C, I, E              |
| 118           | R              | W          | <i>Pd, Dm, Hs</i>                                | <i>At, Vr, Zm, Bn, Rs, Ta</i> | M, A, I                    |

\* = loop missing in current structure

## References

- Bentolila S, Elliott LE, Hanson MR. *Genetic architecture of mitochondrial editing in Arabidopsis thaliana*. Genetics, 2008. **178**(3):1693–1708.
- Brehme N, Glass F, Jörg A, Takenaka M. *MEF46 and MEF47 are novel specificity factors for RNA editing sites in mitochondrial nad transcripts*. Mitochondrion, 2020. 53:121-127.
- Giege, P. and A. Brennicke. *RNA editing in Arabidopsis mitochondria effects 441 C to U changes in ORFs*. Proc Natl Acad Sci U S A, 1999. **96**(26):15324-9.

- Gualberto JM, Bonnard G, Lamattina L, Grienemberger JM. *Expression of the wheat mitochondrial nad3-rps12 transcription unit: correlation between editing and mRNA maturation*. Plant Cell, 1991. **3**(10):1109-1120.
- Grosskopf D, Mulligan RM. *Developmental- and tissue-specificity of RNA editing in mitochondria of suspension-cultured maize cells and seedlings*. Curr Genet., 1996. **29**(6):556-563.
- Handa H. *The complete nucleotide sequence and RNA editing content of the mitochondrial genome of rapeseed (Brassica napus L.): comparative analysis of the mitochondrial genomes of rapeseed and Arabidopsis thaliana*. Nucleic Acids Res., 2003. **31**(20):5907-5916.
- Itani K, Handa H. *Rapeseed mitochondrial ccb206, a gene involved in cytochrome c biogenesis, is co-transcribed with the nad3 and rps12 genes: organization, transcription, and RNA editing of the nad3/rps12/ccb206 locus*. Curr Genet., 1998. **34**(4):318-325.
- Ohtani S, Ichinose M, Tasaki E, Aoki Y, Komura Y, Sugita M. *Targeted gene disruption identifies three PPR-DYW proteins involved in RNA editing for five editing sites of the moss mitochondrial transcripts*. Plant Cell Physiol., 2010. **51**(11):1942-9.
- Qi W, Tian Z, Lu L, Chen X, Chen X, Zhang W, Song R. *Editing of Mitochondrial Transcripts nad3 and cox2 by Dek10 Is Essential for Mitochondrial Function and Maize Plant Development*. Genetics, 2017. **205**(4):1489-1501.
- Rankin CT, Cutright MT, Makaroff CA. *Characterization of the radish mitochondrial nad3/rps12 locus: analysis of recombination repeats and RNA editing*. Curr Genet., 1996. **29**(6):564-571.
- Wang Y, Liu XY, Yang YZ, Huang J, Sun F, Lin J, Gu ZQ, Sayyed A, Xu C, Tan BC. *Empty Pericarp21 encodes a novel PPR-DYW protein that is required for mitochondrial RNA editing at multiple sites, complexes I and V biogenesis, and seed development in maize*. PLoS Genet., 2019. **15**(8):e1008305.

## NAD4

| Position (At) | mt-DNA residue | Edited to: | Conservation of edited residue outside of plants | In plants         | Code                      |
|---------------|----------------|------------|--------------------------------------------------|-------------------|---------------------------|
| 10            | S              | F          | N/A                                              | <i>At, Bv</i>     | M, A                      |
| 15            | P              | L          | N/A                                              | <i>Ta</i>         | M, P                      |
| 25            | T              | I          | N/A                                              | <i>At, Ta, Bv</i> | M, A                      |
| 26            | P              | L          | <i>Dm</i>                                        | <i>Ta</i>         | M, E                      |
| 36            | P              | L          | N/A                                              | <i>At, Ta, Bv</i> | M, P, I                   |
| 52            | P              | S          | <i>Pd, Dm, Hs</i>                                | <i>Ta</i>         | M, P                      |
| 53            | P              | L          | <i>Pd</i>                                        | <i>At, Ta, Bv</i> | M, P, I                   |
| 55            | P              | L          | <i>Yl</i>                                        | <i>At, Ta</i>     | M, E                      |
| 56            | R              | W          | N/A                                              | <i>At, Ta, Bv</i> | M, A, I, E                |
| 66            | S              | F          | <i>Pd, Yl</i>                                    | <i>At, Ta, Bv</i> | M, A                      |
| 106           | S              | L          | <i>Pd, Yl, Dm</i>                                | <i>At, Ta</i>     | M, A, I                   |
| 121           | T              | I          | <i>Pd</i>                                        | <i>At, Ta, Bv</i> | M, A, E                   |
| 123           | S              | F          | <i>Pd</i>                                        | <i>Bv</i>         | M, A                      |
| 126           | R              | C          | N/A                                              | <i>At, Ta, Bv</i> | M                         |
| 134           | S              | F          | <i>Pd, Yl, Dm, Hs</i>                            | <i>Ta</i>         | M, A, C, K, Ph – Ogr1 PPR |
| 135           | R              | C          | N/A                                              | <i>At</i>         | M                         |
| 139           | P              | L          | <i>Pd, Dm, Hs</i>                                | <i>Ta</i>         | M, Ph – Ogr1 PPR          |
| 145           | L              | F          | <i>Pd, Dm, Hs</i>                                | <i>Ta, Bv</i>     | M, Ph – Ogr1 PPR          |
| 146           | S              | F          | <i>Pd, Yl, Dm, Hs</i>                            | <i>Ta, Bv</i>     | M, C, K                   |
| 150           | P              | L          | <i>Pd, Yl, Dm, Hs</i>                            | <i>At, Bv</i>     | M, C, K, I                |
| 203           | S              | L          | <i>Pd, Hs</i>                                    | <i>At, Ta, Bv</i> | M, A                      |
| 220           | S              | F          | <i>Pd</i>                                        | <i>At</i>         | M, A                      |
| 256           | P              | L          | <i>Pd, Hs</i>                                    | <i>At</i>         | M, K                      |
| 262           | H              | Y          | <i>Pd, Yl, Dm, Hs</i>                            | <i>At</i>         | M, A, C, E                |
| 279           | S              | F          | N/A                                              | <i>At, Bv</i>     | M, A                      |
| 299           | S              | L          | <i>Pd, Yl, Dm, Hs</i>                            | <i>At, Bv</i>     | M, A, C, I                |
| 326           | P              | L          | <i>Yl, Dm, Hs</i>                                | <i>Ta</i>         | M                         |
| 337           | P              | L          | <i>Pd, Yl, Dm, Hs</i>                            | <i>At, Bv</i>     | M, C, P, K                |
| 345           | P              | S          | N/A                                              | <i>At</i>         | M, P, K                   |
| 377           | L              | F          | <i>Pd, Hs</i>                                    | <i>At</i>         | M                         |
| 391           | S              | L          | N/A                                              | <i>At</i>         | M, A, I                   |



|     |   |   |           |                   |            |
|-----|---|---|-----------|-------------------|------------|
| 452 | S | L | N/A       | <i>At, Bv</i>     | M, A, I, E |
| 458 | S | F | <i>Yl</i> | <i>At, Ta</i>     | M, A, I    |
| 469 | R | W | N/A       | <i>At, Ta</i>     | M, A, I, E |
| 473 | H | Y | <i>Pd</i> | <i>At, Ta, Bv</i> | M, A, I    |
| 478 | P | L | N/A       | <i>At, Ta, Bv</i> | M, P, I    |
| 480 | R | C | N/A       | <i>Bv</i>         | M, I, E    |

## References

- Giege, P. and A. Brennicke. *RNA editing in Arabidopsis mitochondria effects 441 C to U changes in ORFs*. Proc Natl Acad Sci U S A, 1999. **96**(26):15324-9.
- Itchoda N, Nishizawa S, Nagano H, Kubo T, Mikami T. *The sugar beet mitochondrial nad4 gene: an intron loss and its phylogenetic implication in the Caryophyllales*. Theor Appl Genet., 2002. **104**(2-3):209-213.
- Kim SR, Yang JI, Moon S, et al. *Rice OGR1 encodes a pentatricopeptide repeat-DYW protein and is essential for RNA editing in mitochondria*. Plant J., 2009. **59**(5):738-749.
- Lamattina L, Grienemberger JM. *RNA editing of the transcript coding for subunit 4 of NADH dehydrogenase in wheat mitochondria: uneven distribution of the editing sites among the four exons*. Nucleic Acids Res., 1991. **19**(12):3275-3282.
- Lamattina L, Weil JH, Grienemberger JM. *RNA editing at a splicing site of NADH dehydrogenase subunit IV gene transcript in wheat mitochondria*. FEBS Lett., 1989. **258**(1):79-83.

## NAD4L

| Position (At) | mt-DNA residue | Edited to: | Conservation of edited residue outside of plants | In plants         | Code                            |
|---------------|----------------|------------|--------------------------------------------------|-------------------|---------------------------------|
| 1             | T              | M          | N/A                                              | <i>Bv, Ac</i>     | M, A, I                         |
| 14            | S              | F          | <i>Pd, Dm, Hs</i>                                | <i>At, Vr</i>     | M, A, I                         |
| 16            | S              | L          | <i>Yl, Dm</i>                                    | <i>Bv</i>         | M, A, I                         |
| 19            | R              | W          | N/A                                              | <i>At, Bv</i>     | M, A, Ph – Grs1                 |
| 29            | P              | L          | <i>Dm</i>                                        | <i>At, Vr</i>     | M, I                            |
| 32            | S              | L          | <i>Pd, Dm, Hs</i>                                | <i>At, Vr, Bv</i> | M, A, K, I                      |
| 34            | P              | S          | <i>Pd, Dm</i>                                    | <i>At, Vr</i>     | M, P, I, K                      |
| 37            | S              | L          | <i>Pd</i>                                        | <i>At, Vr, Bv</i> | M, A, P, K, I, E, Ph – SMK6 PPR |
| 44            | S              | L          | <i>Yl</i>                                        | <i>Bv</i>         | M, A, I                         |
| 53            | S              | L          | <i>Pd</i>                                        | <i>At, Vr, Bv</i> | M, A, I                         |
| 60            | S              | L          | <i>Yl</i>                                        | <i>Bv</i>         | M, A, I                         |
| 63            | S              | L          | N/A                                              | <i>At, Vr</i>     | M, A, I                         |
| 66            | P              | L          | <i>Pd, Dm, Hs</i>                                | <i>At, Vr, Bv</i> | M, P, I                         |
| 94            | S              | F          | N/A                                              | <i>Bv</i>         | M, A                            |

## References

- Bentolila S, Elliott LE, Hanson MR. *Genetic architecture of mitochondrial editing in Arabidopsis thaliana*. Genetics, 2008. **178**(3):1693–1708.
- Ding S, Liu XY, Wang HC, Wang Y, Tang JJ, Yang YZ, Tan BC. *SMK6 mediates the C-to-U editing at multiple sites in maize mitochondria*. J Plant Physiol., 2019. **240**:152992.
- Giege, P. and A. Brennicke. *RNA editing in Arabidopsis mitochondria effects 441 C to U changes in ORFs*. Proc Natl Acad Sci U S A, 1999. **96**(26):15324-9.
- Kubo, T. & Yamamoto, M. & Mikami, T. *The nad4L-orf25 gene cluster is conserved and expressed in sugar beet mitochondria*. Theoretical and Applied Genetics, 2000. **100**:214-220.
- Maldonado M, Padavannil A, Zhou L, Guo F, Letts JA. *Atomic structure of a mitochondrial complex I intermediate from vascular plants*. Elife, 2020. **9**: e56664.
- Tsujimura M, Kaneko T, Sakamoto T, et al. *Multichromosomal structure of the onion mitochondrial genome and a transcript analysis*. Mitochondrion, 2019. **46**:179-186.

Xie T, Chen D, Wu J, et al. *Growing Slowly 1 locus encodes a PLS-type PPR protein required for RNA editing and plant development in Arabidopsis*. J Exp Bot., 2016. **67**(19):5687-5698.

## NAD5

| Position (At) | mt-DNA residue | Edited to: | Conservation of edited residue outside of plants | In plants                 | Code                       |
|---------------|----------------|------------|--------------------------------------------------|---------------------------|----------------------------|
| 52            | P              | L          | <i>Dm</i>                                        | <i>At, Ob</i>             | M, I                       |
| 81            | P              | L          | <i>Pd, Yl</i>                                    | <i>At, Ob</i>             | M                          |
| 91            | S              | F          | N/A                                              | <i>Ob</i>                 | M, A                       |
| 120           | L              | F          | <i>Pd, Yl, Dm, Hs</i>                            | <i>At, Ob</i>             | M, C                       |
| 133           | S              | F          | <i>Hs</i>                                        | <i>At, Ob</i>             | M, A                       |
| 165           | T              | I          | <i>Hs</i>                                        | <i>At, Ob</i>             | M, A, I                    |
| 169           | P              | L          | <i>Yl, Dm, Hs</i>                                | <i>Ob</i>                 | M, P, I                    |
| 180           | P              | L          | <i>Pd, Yl, Dm, Hs</i>                            | <i>Ob</i>                 | M, C, P, I                 |
| 183           | S              | L          | N/A                                              | <i>At, Ob</i>             | M, A, I                    |
| 185           | R              | C          | N/A                                              | <i>At, Ob</i>             | M                          |
| 200           | R              | C          | N/A                                              | <i>At, Ob, Pp</i>         | I, Ph – PpPPR_79 PPR       |
| 203           | F              | V          | N/A                                              | <i>At</i>                 | I                          |
| 210           | F              | R          | N/A                                              | <i>At</i>                 | M, A                       |
| 238           | S              | L          | <i>Pd, Yl, Hs</i>                                | <i>At, Ob</i>             | M, A                       |
| 241           | R              | W          | <i>Pd, Yl, Dm, Hs</i>                            | <i>Pp</i>                 | M, A, C, Ph – PpPPR_91 PPR |
| 242           | S              | L          | <i>Pd, Yl, Dm, Hs</i>                            | <i>At, Ob</i>             | M, A, C, K                 |
| 255           | R              | L          | <i>Pd, Yl, Dm, Hs</i>                            | <i>At</i>                 | M, A, C                    |
| 279           | P              | S          | <i>Dm, Hs</i>                                    | <i>At, Ob</i>             | M                          |
| 288           | S              | F          | N/A                                              | <i>Ob</i>                 | M, A                       |
| 292           | T              | M          | N/A                                              | <i>At, Ob</i>             | M, A                       |
| 467           | S              | L          | <i>Pd</i>                                        | <i>Ob</i>                 | M, A                       |
| 497           | P              | L          | N/A                                              | <i>At, Ob, Ta, Hv</i>     | M                          |
| 517           | I              | T          | N/A                                              | <i>At, Zm, Ta</i>         | M, A, Ph – ppr2263 PPR     |
| 523           | D              | L          | N/A                                              | <i>Ob</i>                 | M, A,                      |
| 527           | S              | L          | <i>Pd, Yl, Hs</i>                                | <i>At, Ob, Pp, Ta, Os</i> | M, A, Ph – mpr25 PPR       |
| 530           | I              | F          | N/A                                              | <i>Ob, Ta</i>             | M                          |
| 551           | F              | S          | <i>Dm</i>                                        | <i>Hv</i>                 | M, A                       |
| 620           | S              | F          | N/A                                              | <i>Ta, Hv</i>             | M, A                       |
| 632           | S              | L          | <i>Hs</i>                                        | <i>At, Ta, Hv</i>         | M, A, I                    |
| 634           | P              | L          | N/A                                              | <i>Hv</i>                 | M, P, Ph                   |

|     |   |   |     |                       |                         |
|-----|---|---|-----|-----------------------|-------------------------|
| 639 | S | F | N/A | <i>At, Ob, Ta, Hv</i> | M, A, I, Ph – DEK40 PPR |
| 640 | R | C | N/A | <i>At, Ob, Ta, Hv</i> | M, A, Ph                |
| 653 | S | L | N/A | <i>At, Ta</i>         | Ph – MEF46 PPR          |

## References

- Brehme N, Glass F, Jörg A, Takenaka M. *MEF46 and MEF47 are novel specificity factors for RNA editing sites in mitochondrial nad transcripts*. Mitochondrion, 2020. **53**:121-127.
- Giege, P. and A. Brennicke. *RNA editing in Arabidopsis mitochondria effects 441 C to U changes in ORFs*. Proc Natl Acad Sci U S A, 1999. **96**(26):15324-9.
- Knoop V, Schuster W, Wissinger B, Brennicke A. *Trans splicing integrates an exon of 22 nucleotides into the nad5 mRNA in higher plant mitochondria*. EMBO J., 1991. **10**(11):3483-3493.
- Maldonado M, Padavannil A, Zhou L, Guo F, Letts JA. *Atomic structure of a mitochondrial complex I intermediate from vascular plants*. Elife, 2020. **9**: e56664.
- Ohtani S, Ichinose M, Tasaki E, Aoki Y, Komura Y, Sugita M. *Targeted gene disruption identifies three PPR-DYW proteins involved in RNA editing for five editing sites of the moss mitochondrial transcripts*. Plant Cell Physiol., 2010. **51**(11):1942-1949.
- Pereira de Souza A, Jubier MF, Delcher E, Lancelin D, Lejeune B. *A trans-splicing model for the expression of the tripartite nad5 gene in wheat and maize mitochondria*. Plant Cell, 1991. **3**(12):1363-1378.
- Ramadan AM, Alnufaei AA, Khan TK, Ali HM, Eissa HF, Hassan SM. *The first report of RNA U to C or G editing in the mitochondrial NADH dehydrogenase subunit 5 (Nad5) transcript of wild barley*. Mol Biol Rep., 2021. **48**(8):6057-6064.
- Ren RC, Lu X, Zhao YJ, Wei YM, Wang LL, Zhang L, Zhang WT, Zhang C, Zhang XS, Zhao XY. *Pentatricopeptide repeat protein DEK40 is required for mitochondrial function and kernel development in maize*. J Exp Bot., 2019. **70**(21):6163-6179.
- Sosso D, Mbelo S, Vernoud V, et al. *PPR2263, a DYW-Subgroup Pentatricopeptide repeat protein, is required for mitochondrial nad5 and cob transcript editing, mitochondrion biogenesis, and maize growth*. Plant Cell, 2012. **24**(2):676-691.
- Toda T, Fujii S, Noguchi K, Kazama T, Toriyama K. *Rice MPR25 encodes a pentatricopeptide repeat protein and is essential for RNA editing of nad5 transcripts in mitochondria*. Plant J., 2012. **72**(3):450-460.

Uchida M, Ohtani S, Ichinose M, Sugita C, Sugita M. *The PPR-DYW proteins are required for RNA editing of rps14, cox1 and nad5 transcripts in Physcomitrella patens mitochondria.* FEBS Lett., 2011. **585**(14):2367-71.

## NAD6

| Position (At) | mt-DNA residue | Edited to: | Conservation of edited residue outside of plants | In plants               | Code                   |
|---------------|----------------|------------|--------------------------------------------------|-------------------------|------------------------|
| 9             | P              | L          | YI                                               | At, Vr, Zm              | M, P, I, E             |
| 18            | A              | V          | Pd                                               | At, Vr                  | M, I                   |
| 30            | P              | F          | N/A                                              | At, Vr, Zm              | M, P, I, Ph – Grs1 PPR |
| 32            | P              | L          | Pd                                               | At, Vr                  | M, P, E                |
| 35            | R              | C          | Dm                                               | At, Vr                  | M, A, E                |
| 49            | S              | F          | Pd                                               | Zm                      | M, A, I                |
| 54            | P              | L          | N/A                                              | At, Vr, Zm              | M, P, K, I             |
| 57            | H              | Y          | Pd, YI, Hs                                       | At, Vr, Zm <sup>4</sup> | M, A, K, I             |
| 64            | S              | L          | Pd, YI, Dm                                       | At, Vr, Zm              | M, A, I                |
| 149           | S              | F          | Pd                                               | At, Zm                  | M, A, I                |
| 190           | S              | F          | N/A                                              | Zm                      | M, A                   |

## References

- Bentolila S, Elliott LE, Hanson MR. *Genetic architecture of mitochondrial editing in Arabidopsis thaliana*. Genetics, 2008. **178**(3):1693–1708.
- Giege, P. and A. Brennicke. *RNA editing in Arabidopsis mitochondria effects 441 C to U changes in ORFs*. Proc Natl Acad Sci U S A, 1999. **96**(26):15324-9.
- Haouazine-Takvorian N, Takvorian A, Jubier MF, Lejeune B. *Genes encoding subunit 6 of NADH dehydrogenase and subunit 6 of ATP synthase are co-transcribed in maize mitochondria*. Curr Genet., 1997. **31**(1):63-69.
- Maldonado M, Padavannil A, Zhou L, Guo F, Letts JA. *Atomic structure of a mitochondrial complex I intermediate from vascular plants*. Elife, 2020. **9**: e56664.
- Xie T, Chen D, Wu J, et al. *Growing Slowly 1 locus encodes a PLS-type PPR protein required for RNA editing and plant development in Arabidopsis*. J Exp Bot., 2016. **67**(19):5687-5698.

## NAD7

| Position (At) | mt-DNA residue | Edited to: | Conservation of edited residue outside of plants | In plants                     | Code                    |
|---------------|----------------|------------|--------------------------------------------------|-------------------------------|-------------------------|
| 13            | S              | L          | <i>Dm, Hs</i>                                    | <i>At, St</i>                 | A, I                    |
| 26            | S              | L          | <i>Pd, Yl, Dm, Hs</i>                            | <i>At, Vr, Zm, Ta, Os</i>     | A, C, K, Ph – EMP21 PPR |
| 28            | S              | L          | <i>Yl, Dm, Hs</i>                                | <i>St</i>                     | A                       |
| 46            | S              | L          | <i>Pd, Yl, Dm, Hs</i>                            | <i>At, Vr, Os</i>             | A, C                    |
| 67            | S              | F          | <i>Yl, Dm, Hs</i>                                | <i>At, Vr, Os</i>             | A                       |
| 82            | H              | Y          | <i>Dm, Hs</i>                                    | <i>At, Vr</i>                 | A                       |
| 84            | S              | L          | <i>Pd, Yl, Dm, Hs</i>                            | <i>At, Vr</i>                 | A, C, I                 |
| 106           | R              | C          | N/A                                              | <i>At, Vr</i>                 | A, K                    |
| 112           | S              | L          | <i>Pd, Yl, Dm, Hs</i>                            | <i>At, Vr</i>                 | A, C, K                 |
| 115           | S              | L          | <i>Pd, Yl</i>                                    | <i>At</i>                     | A, K                    |
| 193           | S              | L          | <i>Pd, Yl, Dm, Hs</i>                            | <i>At, Vr</i>                 | A, C                    |
| 233           | S              | L          | <i>Pd, Dm, Hs</i>                                | <i>At, Vr</i>                 | A, K, I                 |
| 242           | H              | Y          | <i>Pd, Yl, Dm, Hs</i>                            | <i>At, Vr</i>                 | A, C, K                 |
| 245           | S              | L          | N/A                                              | <i>At, Vr</i>                 | A                       |
| 247           | L              | F          | <i>Pd, Yl, Dm, Hs</i>                            | <i>At, Vr, Zm<sup>7</sup></i> | C, K, Ph – SMK6 PPR     |
| 257           | R              | C          | <i>Pd, Yl, Dm, Hs</i>                            | <i>At, Vr</i>                 | C, Ph – SMK1 PPR        |
| 279           | P              | L          | <i>Dm, Hs</i>                                    | <i>Vr, Zm, Ta, Os</i>         | P, Ph – SMK1 PPR        |
| 353           | R              | C          | <i>Yl, Dm, Hs</i>                                | <i>At, Vr</i>                 | A                       |
| 360           | S              | F          | <i>Pd, Yl, Dm, Hs</i>                            | <i>At, Vr</i>                 | A, C, I                 |
| 363           | S              | L          | <i>Pd, Yl, Dm, Hs</i>                            | <i>At, Vr</i>                 | A, C                    |
| 368           | S              | F          | N/A                                              | <i>At, Vr</i>                 | A                       |
| 375           | P              | L          | <i>Pd, Yl, Dm, Hs</i>                            | <i>At, Vr</i>                 | C, I                    |

## References

- Bentolila S, Elliott LE, Hanson MR. *Genetic architecture of mitochondrial editing in Arabidopsis thaliana*. Genetics, 2008. **178**(3): p. 1693–1708.
- Carrillo C, Bonen L. *RNA editing status of nad7 intron domains in wheat mitochondria*. Nucleic Acids Res., 1997. **25**(2):403-409.
- Ding S, Liu XY, Wang HC, et al. *SMK6 mediates the C-to-U editing at multiple sites in maize mitochondria*. J Plant Physiol., 2019. **240**:152992.



- Gäbler L, Herz U, Liddell A, et al. *The 42.5 kDa subunit of the NADH: ubiquinone oxidoreductase (complex I) in higher plants is encoded by the mitochondrial nad7 gene*. Mol Gen Genet., 1994. **244**(1):33-40.
- Li XJ, Zhang YF, Hou M, et al. *Small kernel 1 encodes a pentatricopeptide repeat protein required for mitochondrial nad7 transcript editing and seed development in maize (Zea mays) and rice (Oryza sativa)*. Plant J., 2014. **79**(5):797-809.
- Maldonado M, Padavannil A, Zhou L, Guo F, Letts JA. *Atomic structure of a mitochondrial complex I intermediate from vascular plants*. Elife, 2020. **9**: e56664.
- Takenaka M. *MEF9, an E-subclass pentatricopeptide repeat protein, is required for an RNA editing event in the nad7 transcript in mitochondria of Arabidopsis*. Plant Physiol., 2010. **152**(2):939-947.
- Wang Y, Liu XY, Yang YZ, et al. *Empty Pericarp21 encodes a novel PPR-DYW protein that is required for mitochondrial RNA editing at multiple sites, complexes I and V biogenesis, and seed development in maize*. PLoS Genet., 2019. **15**(8):e1008305.

## NAD9

| Position (At) | mt-DNA residue | Edited to: | Conservation of edited residue outside of plants | In plants                 | Code                   |
|---------------|----------------|------------|--------------------------------------------------|---------------------------|------------------------|
| 5             | S              | F          | N/A                                              | <i>Ta, Os</i>             | A, I                   |
| 31            | S              | F          | N/A                                              | <i>At, Vr, Ta, Os, St</i> | A                      |
| 38            | P              | L          | <i>Pd</i>                                        | <i>Ta, Os</i>             | E                      |
| 56            | S              | L          | <i>Pd, Dm, Hs</i>                                | <i>At, Vr, Ta, Os, St</i> | A, E                   |
| 64            | H              | Y          | <i>Yl</i>                                        | <i>At, Ta, Os</i>         | A, I, Ph – EMP5 PPR    |
| 75            | H              | Y          | <i>Pd, Yl, Dm, Hs</i>                            | <i>Ta, Os</i>             | A, C, E                |
| 100           | P              | S          | <i>Pd, Yl, Dm, Hs</i>                            | <i>At, Vr, Ta, Os, St</i> | C, E                   |
| 104           | P              | L          | <i>Yl, Pd</i>                                    | <i>Os</i>                 | I                      |
| 110           | R              | W          | <i>Pd, Yl, Dm, Hs</i>                            | <i>Vr, Ta, Os, St</i>     | A, C, I, Ph – EMP5 PPR |
| 119           | S              | F          | <i>Pd, Hs</i>                                    | <i>Ta, Os</i>             | A, Ph – EMP5 PPR       |
| 123           | S              | F          | <i>Pd, Yl, Dm, Hs</i>                            | <i>Ta, Os, St</i>         | A, C, E                |
| 133           | S              | L          | <i>Pd, Dm, Hs</i>                                | <i>At, Vr, Ta, St</i>     | A, I                   |
| 147           | L              | F          | <i>Pd, Yl, Dm, Hs</i>                            | <i>At, Vr, St</i>         | A, C                   |

## References

- Bentolila S, Elliott LE, Hanson MR. *Genetic architecture of mitochondrial editing in Arabidopsis thaliana*. Genetics, 2008. **178**(3):1693–1708.
- Giege, P. and A. Brennicke. *RNA editing in Arabidopsis mitochondria effects 441 C to U changes in ORFs*. Proc Natl Acad Sci U S A, 1999. **96**(26):15324-9.
- Grohmann L, Thieck O, Herz U, Schröder W, Brennicke A. *Translation of nad9 mRNAs in mitochondria from Solanum tuberosum is restricted to completely edited transcripts*. Nucleic Acids Res., 1994. **22**(16): 3304-11.
- Lamattina L, Gonzalez D, Gualberto J, Grienemberger JM. *Higher plant mitochondria encode a homologue of the nuclear-encoded 30-kDa subunit of bovine mitochondrial complex I*. Eur J Biochem., 1993. **217**(3):831-838.
- Liu YJ, Xiu ZH, Meeley R, Tan BC. *Empty pericarp5 encodes a pentatricopeptide repeat protein that is required for mitochondrial RNA editing and seed development in maize*. Plant Cell, 2013. **25**(3):868-883.
- Maldonado M, Padavannil A, Zhou L, Guo F, Letts JA. *Atomic structure of a mitochondrial complex I intermediate from vascular plants*. Elife, 2020. **9**: e56664.

- Nishiwaki S, Nakazono M, Tsutsumi N, Hirai A. *Structure of a gene subunit 9 of NADH dehydrogenase (nad9) in rice mitochondria and RNA editing of its transcript*. Plant Cell Physiol., 1995. **36**(6):1135-38.
- Wang Y, Liu XY, Yang YZ, Huang J, Sun F, Lin J, Gu ZQ, Sayyed A, Xu C, Tan BC. *Empty Pericarp21 encodes a novel PPR-DYW protein that is required for mitochondrial RNA editing at multiple sites, complexes I and V biogenesis, and seed development in maize*. PLoS Genet., 2019. **15**(8):e1008305.

## Complex III<sub>2</sub>

### COB

| Position (Vr) | mt-DNA | Edited to: | Conservation of edited residue outside of plants | In plants                 | Code                |
|---------------|--------|------------|--------------------------------------------------|---------------------------|---------------------|
| 18            | T      | I          | N/A                                              | <i>St</i>                 | M, A                |
| 60            | H      | Y          | <i>Sc, Cr, Dm, Hs</i>                            | <i>Ta</i>                 | M, C, H             |
| 96            | L      | F          | <i>Sc, Cr, Dm, Hs</i>                            | <i>At, Vr, Ta, Os, St</i> | M, C                |
| 100           | H      | Y          | <i>Pd, Yl, Cr, Dm, Bt</i>                        | <i>Vr, Ta, Os, St</i>     | M, A                |
| 109           | H      | Y          | <i>Sc, Cr, Dm, Hs</i>                            | <i>At, Vr, Ta, Os, St</i> | M, A, C             |
| 120           | R      | W          | <i>Sc, Cr, Dm, Hs</i>                            | <i>Vr, Ta, St</i>         | M, A, C, H          |
| 140           | P      | L          | <i>Pd, Yl, Cr, Dm, Bt, Hs</i>                    | <i>Ta</i>                 | H                   |
| 188           | P      | L          | <i>Pd, Sc, Yl</i>                                | <i>Ta</i>                 | M, P, I             |
| 190           | H      | Y          | <i>Pd, Sc, Yl, Cr</i>                            | <i>At, Vr, Ta, Os, St</i> | M, A, H, I          |
| 194           | L      | F          | <i>Sc, Cr, Dm, Hs</i>                            | <i>Ta</i>                 | M, C, H, I          |
| 227           | S      | F          | <i>Pd, Cr, Dm, Bt, Hs</i>                        | <i>Ta, St</i>             | M, A                |
| 239           | R      | W          | N/A                                              | <i>Ta</i>                 | M, A                |
| 242           | S      | F          | <i>Sc, Yl, Hs</i>                                | <i>Ta</i>                 | M, A                |
| 270           | P      | S          | N/A                                              | <i>Vr, Ta, Os, St</i>     | Q                   |
| 285           | H      | Y          | <i>Sc, Cr, Dm, Hs</i>                            | <i>At, Vr, Ta, Os, St</i> | M, C, Q             |
| 303           | P      | L          | N/A                                              | <i>At, Vr, Ta, Os, St</i> | M, P, Ph – EMP5 PPR |
| 328           | H      | Y          | N/A                                              | <i>At, Vr, Ta, Os, St</i> | M, A                |
| 339           | R      | C          | N/A                                              | <i>At, Vr</i>             | M                   |
| 361           | P      | S          | N/A                                              | <i>Vr, Os, St</i>         | M, P                |
| 362           | P      | S          | N/A                                              | <i>St</i>                 | M, P                |
| 375           | P      | L          | N/A                                              | <i>Vr, Ta, Os, St</i>     | M, P                |

### References

- Giege, P. and A. Brennicke. *RNA editing in Arabidopsis mitochondria effects 441 C to U changes in ORFs*. Proc Natl Acad Sci U S A, 1999. **96**(26):15324-9.
- Gualberto JM, Lamattina L, Bonnard G, Weil JH, Grienemberger JM. *RNA editing in wheat mitochondria results in the conservation of protein sequences*. Nature, 1989. **341**(6243):660-662.

- Ito Y, Nakazono M, Kadowaki K, Tsutsumi N, Hirai A. *RNA editing of transcripts of the gene for apocytochrome b (cob) in rice mitochondria*. Genes Genet Syst., 1996. **71**(2):85-89.
- Liu YJ, Xiu ZH, Meeley R, Tan BC. *Empty pericarp5 encodes a pentatricopeptide repeat protein that is required for mitochondrial RNA editing and seed development in maize*. Plant Cell, 2013. **25**(3):868-883.
- Maldonado M, Guo F, Letts JA. *Atomic structures of respiratory complex III<sub>2</sub>, complex IV, and supercomplex III<sub>2</sub>-IV from vascular plants*. Elife, 2021. **9**: e56664.
- Zanlungo S, Bégu D, Quiñones V, Araya A, Jordana X. *RNA editing of apocytochrome b (cob) transcripts in mitochondria from two genera of plants*. Curr Genet., 1993. **24**(4):344-348.

## Complex IV

### COX1

| Position (Vr) | mt-DNA | Edited to: | Conservation of edited residue outside of plants | In plants                        | Code                |
|---------------|--------|------------|--------------------------------------------------|----------------------------------|---------------------|
| 81            | S      | F          | <i>Pd, Sc, Dm, Bt, Hs</i>                        | <i>At, Zm</i>                    | M, A, C, H          |
| 85            | S      | F          | <i>Pd</i>                                        | <i>At, Zm</i>                    | M, A, H             |
| 148           | S      | L          | <i>Pd, Sc, Dm, Bt, Hs</i>                        | <i>At, Zm</i>                    | M, A, C, I          |
| 151           | S      | F          | <i>Pd, Sc, Dm, Bt, Hs</i>                        | <i>At, Zm</i>                    | M, A, I             |
| 172           | S      | F          | N/A                                              | <i>At, Zm</i>                    | M                   |
| 192           | P      | L          | <i>Hs</i>                                        | <i>At, Zm</i>                    | M                   |
| 197           | P      | L          | <i>Pd, Sc, Bt, Hs</i>                            | <i>At</i>                        | M, C, P             |
| 223           | S      | F          | <i>Pd, Sc, Dm, Bt, Hs</i>                        | vascular and non-vascular plants | M, A, C             |
| 239           | R      | W          | <i>Pd, Sc, Dm, Bt, Hs</i>                        | vascular and non-vascular plants | M, A, C, H, KC      |
| 249           | P      | L          | <i>Pd, Sc, Dm, Bt, Hs</i>                        | vascular and non-vascular plants | M, H, C, KC         |
| 254           | S      | F          | <i>Pd, Sc, Dm, Bt, Hs</i>                        | vascular and non-vascular plants | M, A, C, KC         |
| 396           | H      | Y          | <i>Pd, Sc</i>                                    | <i>At, Zm</i>                    | M, A, HC            |
| 427           | L      | F          | <i>Pd, Sc, Dm, Bt, Hs</i>                        | vascular and non-vascular plants | M, C, H             |
| 469           | R      | C          | N/A                                              | <i>At</i>                        | M, HC               |
| 497           | P      | S          | <i>Sc, Hs</i>                                    | <i>Zm</i>                        | K, I, Ph – SMK4 PPR |

### References

- Jerome Coyne H, Ciofi-Baffoni S, Banci L, Bertini I, Zhang L, George GN, Winge DR. *The Characterization and Role of Zinc Binding in Yeast Cox4\**. JBC, 2007. **282**(12):8926-34.
- Sper-Whitis, G.L., J.L. Moody, and J.C. Vaughn. *Universality of mitochondrial RNA editing in cytochrome-c oxidase subunit I (coxI) among the land plants*. Biochim Biophys Acta, 1996. **1307**(3):301-8.
- Suzuki H, Yu J, Ness SA, O'Connell MA, Zhang J. *RNA editing events in mitochondrial genes by ultra-deep sequencing methods: a comparison of cytoplasmic male sterile, fertile, and restored genotypes in cotton*. Mol Genet Genomics, 2013. **288**(9):445-57.

Wang Y, Liu XY, Huang ZQ, et al. *PPR-DYW Protein EMP17 Is Required for Mitochondrial RNA Editing, Complex III Biogenesis, and Seed Development in Maize*. *Front Plant Sci.*, 2021. **12**:693272.

## COX2

| Position (At/Vr) | mt-DNA residue | Edited to: | Conservation of edited residue outside of plants | In plants                         | Code                       |
|------------------|----------------|------------|--------------------------------------------------|-----------------------------------|----------------------------|
| 3                | S              | L          | N/A                                              | <i>Zm</i>                         | N/A                        |
| 9                | L              | F          | N/A                                              | <i>At, Zm</i>                     | N/A                        |
| 24               | S              | F          | <i>Pd, Yl</i>                                    | <i>At, Zm</i>                     | M, A, I                    |
| 54               | S              | L          | <i>Hs</i>                                        | <i>Zm, Os</i>                     | M, A, Ph – Ogr1 PPR        |
| 55               | R              | W          | N/A                                              | <i>Zm</i>                         | M, A, I                    |
| 85               | R              | W          | <i>Pd, Yl, Dm, Hs</i>                            | <i>At, Zm, Ob, Ta, Os, Ps, Gm</i> | M, A, C, I                 |
| 93               | S              | L          | <i>Pd, Yl, Dm, Hs</i>                            | <i>At, Zm, Ob, Os, Ps, Gm</i>     | M, A, C, I                 |
| 123              | R              | W          | <i>Pd, Yl, Dm, Hs</i>                            | <i>Pp</i>                         | A, C, K                    |
| 125              | R              | W          | <i>Pd, Yl, Dm, Hs</i>                            | <i>Zm</i>                         | A, C, K, Ph – PpPPR_77 PPR |
| 127              | R              | W          | <i>Pd, Yl, Dm, Hs</i>                            | <i>At, Zm, Ob, Ta, Os, Ps, Gm</i> | A, C, K, E                 |
| 148              | T              | M          | <i>Pd, Dm, Hs</i>                                | <i>Zm</i>                         | A, K, Ph – EMP18 PPR       |
| 159              | S              | L          | <i>Yl, Hs</i>                                    | <i>At</i>                         | A, I                       |
| 182              | P              | S          | <i>Yl, Hs</i>                                    | <i>Zm</i>                         | P, K, Ph – DEK10 PPR       |
| 186              | P              | L          | <i>Hs</i>                                        | <i>At, Zm, Ta</i>                 | I, K, E                    |
| 194              | S              | L          | <i>Yl, Dm, Hs</i>                                | <i>At, Zm, Ob, Ta, Os</i>         | A                          |
| 205              | S              | L          | <i>Yl, Dm, Hs</i>                                | <i>Zm, Ta, Os</i>                 | A, I                       |
| 211              | S              | L          | <i>Yl</i>                                        | <i>Ta</i>                         | A                          |
| 226              | R              | C          | <i>Pd, Yl, Dm, Hs</i>                            | <i>Ta</i>                         | C, K, Cu, I, E, Cu         |
| 233              | T              | M          | <i>Pd, Yl, Dm, Hs</i>                            | <i>At, Zm, Ta, Os, Gm</i>         | C, K, Cu, E                |
| 241              | P              | S          | <i>Pd, Yl</i>                                    | <i>At</i>                         | P                          |
| 248              | R              | W          | <i>Pd, Yl, Dm</i>                                | <i>At</i>                         | A                          |

## References

- Covello PS, Gray MW. *RNA editing in plant mitochondria* [published correction appears in Nature 1989 Nov 23;342(6248):460]. Nature, 1989. **341**(6243):662-666.
- Giege, P. and A. Brennicke. *RNA editing in Arabidopsis mitochondria effects 441 C to U changes in ORFs*. Proc Natl Acad Sci U S A, 1999. **96**(26):15324-9.



- Gualberto JM, Lamattina L, Bonnard G, Weil JH, Grienemberger JM. *RNA editing in wheat mitochondria results in the conservation of protein sequences*. Nature, 1989. **341**(6243):660-662.
- Kim SR, Yang JI, Moon S, et al. *Rice OGR1 encodes a pentatricopeptide repeat-DYW protein and is essential for RNA editing in mitochondria*. Plant J., 2009. **59**(5):738-749.
- Li XL, Huang WL, Yang HH, et al. *EMP18 functions in mitochondrial atp6 and cox2 transcript editing and is essential to seed development in maize*. New Phytol., 2019. **221**(2):896-907.
- Ohtani S, Ichinose M, Tasaki E, Aoki Y, Komura Y, Sugita M. *Targeted gene disruption identifies three PPR-DYW proteins involved in RNA editing for five editing sites of the moss mitochondrial transcripts*. Plant Cell Physiol., 2010. **51**(11):1942-1949.
- Qi W, Tian Z, Lu L, Chen X, Chen X, Zhang W, Song R. *Editing of Mitochondrial Transcripts nad3 and cox2 by Dek10 Is Essential for Mitochondrial Function and Maize Plant Development*. Genetics, 2017. **205**(4):1489-1501.
- Yang AJ, Mulligan RM. *RNA editing intermediates of cox2 transcripts in maize mitochondria*. Mol Cell Biol., 1991. **11**(8):4278-4281.

## COX3

| Position | mt-DNA | Edited to: | Conservation of edited residue outside of plants | In plants             | Code                          |
|----------|--------|------------|--------------------------------------------------|-----------------------|-------------------------------|
| 82       | P      | L          | <i>Pd, Dm, RS, Hs</i>                            | <i>At, Ta, Mg, Oe</i> | M, C, P, DC, I, Ph – EMP5 PPR |
| 86       | S      | F          | <i>Pd, Sc, RS</i>                                | <i>At, Ta, Mg, Oe</i> | M, A, I, Ph – EMP5 PPR        |
| 88       | P      | L          | <i>Pd, Dm, RS, Hs</i>                            | <i>Mg</i>             | M, C, P, I                    |
| 102      | R      | W          | <i>Pd, Sc, Dm, Rs, Hs</i>                        | <i>Mg, Oe</i>         | M, A, C, KC, I                |
| 104      | S      | F          | <i>Pd, Dm, RS, Hs</i>                            | <i>At, Ta, Mg, Oe</i> | M, A, C, I, Ph – DEK45 PPR    |
| 105      | S      | F          | <i>Sc, Dm, RS</i>                                | <i>At, Ta, Mg, Oe</i> | M, A, I                       |
| 138      | P      | L          | <i>Pd, RS</i>                                    | <i>At, Ta, Mg, Oe</i> | M, P                          |
| 141      | P      | L          | <i>Pd, Dm, RS, Hs</i>                            | <i>At, Zm, Pp</i>     | M, C, P, Ph – Mef11 PPR       |
| 171      | S      | L          | <i>Dm, Hs</i>                                    | <i>Ta, Mg</i>         | M, P                          |
| 189      | S      | F          | <i>Pd, Dm, RS, Hs</i>                            | <i>At, Os</i>         | M, A, C, Ph – PpPPR_77 PPR    |
| 245      | R      | W          | <i>Dm, Rs, Hs</i>                                | <i>At, Vr, Zm, Pp</i> | M, A, C, Ph – Ogr1 PPR        |
| 252      | R      | W          | <i>Pd, Sc, Dm, RS, Hs</i>                        | <i>At, Ta, Mg, Oe</i> | M, A, C                       |

## References

- Kim SR, Yang JI, Moon S, et al. *Rice OGR1 encodes a pentatricopeptide repeat-DYW protein and is essential for RNA editing in mitochondria*. Plant J., 2009. **59**(5):738-749.
- Liu YJ, Xiu ZH, Meeley R, Tan BC. *Empty pericarp5 encodes a pentatricopeptide repeat protein that is required for mitochondrial RNA editing and seed development in maize*. Plant Cell, 2013. **25**(3):868-883.
- Ohtani S, Ichinose M, Tasaki E, Aoki Y, Komura Y, Sugita M. *Targeted gene disruption identifies three PPR-DYW proteins involved in RNA editing for five editing sites of the moss mitochondrial transcripts*. Plant Cell Physiol., 2010. **51**(11):1942-9.
- Ren RC, Lu X, Zhao YJ, et al. *Pentatricopeptide repeat protein DEK40 is required for mitochondrial function and kernel development in maize*. J Exp Bot., 2019. **70**(21):6163-6179.
- Verbitskiy D, Zehrmann A, van der Merwe JA, Brennicke A, Takenaka M. *The PPR protein encoded by the LOVASTATIN INSENSITIVE 1 gene is involved in RNA editing at three sites in mitochondria of Arabidopsis thaliana*. Plant J., 2010. **61**(3):446-55.
